# Supplementary material
Source: PubMed Central journal article supplement (PMC8597209)
Supplement: 12995_2021_331_MOESM1_ESM.pdf [file 12995_2021_331_MOESM1_ESM.pdf]

Additional file 1: Origins, years of entry, affiliations and variable names of items

| Scale                                  | Item                                                                                             | International Core/*Additional item name | Item name in German version | Origin (see below) | Year of entry in German version |
|----------------------------------------|--------------------------------------------------------------------------------------------------|------------------------------------------|-----------------------------|--------------------|---------------------------------|
| Quantitative Demands                   | Do you have to work very fast?                                                                   | WP1                                      | B1_1                        | 1                  | 2005                            |
|                                        | Do you work at a high pace throughout the day?                                                   | WP2                                      | B1_2                        | 2                  | 2017                            |
|                                        | How often do you not have time to complete all your work tasks?                                  | QD4                                      | B1_3                        | 1                  | 2005                            |
|                                        | Do you get behind with your work?                                                                | QD3                                      | B1_4                        | 1                  | 2017                            |
|                                        | Do you have to do overtime?                                                                      | *CT5                                     | B1_5                        | 1                  | 2005                            |
| Emotional Demands                      | Do you have to deal with other people's personal problems as part of your work?                  | EDX2                                     | B1_6                        | 2                  | 2017                            |
|                                        | Is your work emotionally demanding?                                                              | ED3                                      | B1_7                        | 1                  | 2005                            |
| Hiding Emotions                        | Does your work require that you hide your feelings?                                              | *HE2                                     | B1_8                        | 1                  | 2005                            |
|                                        | Does your work require that you do not state your opinion?                                       | *HE4                                     | B1_9                        | 1                  | 2005                            |
| Work Privacy Conflicts                 | The demands of my work interfere with my private and family life.                                | -                                        | B2_1                        | 3                  | 2005                            |
|                                        | Due to work-related duties, I have to make changes to my plans for private or family activities. | -                                        | B2_2                        | 3                  | 2005                            |
|                                        | My work drains so much of my energy that it has a negative effect on my private life.            | WF2                                      | B2_3                        | 2                  | 2017                            |
|                                        | My work takes so much of my time that it has a negative effect on my private life.               | WF3                                      | B2_4                        | 2                  | 2017                            |
| Dissolution                            | I take care of work-related tasks outside of my working time as well.                            | -                                        | B2_5                        | 4                  | 2017                            |
|                                        | I'm available in my free time for people with whom I deal professionally.                        | -                                        | B2_6                        | 4                  | 2017                            |
| Influence at Work                      | Do you have a large degree of influence on the decisions concerning your work?                   | INX1                                     | B3_1                        | 1                  | 2005                            |
|                                        | Can you influence the amount of work assigned to you?                                            | *IN3                                     | B3_2                        | 1                  | 2005                            |
|                                        | Do you have any influence on what you do at work?                                                | *IN4                                     | B3_3                        | 1                  | 2005                            |
| Degrees of Freedom (Breaks / Holidays) | Can you decide when to take a break?                                                             | *CT1                                     | B3_4                        | 1                  | 2005                            |
|                                        | Can you take holidays more or less when you wish?                                                | *CT2                                     | B3_5                        | 1                  | 2005                            |
| Possibilities for Development          | Is your work varied?                                                                             | *VA1                                     | B4_1                        | 1                  | 2005                            |
|                                        | Do you have the possibility of learning new things through your work?                            | PD2                                      | B5_1                        | 1                  | 2005                            |

|                              |                                                                                                                                       |       |      |   |      |
|------------------------------|---------------------------------------------------------------------------------------------------------------------------------------|-------|------|---|------|
|                              | Can you use your skills or expertise in your work?                                                                                    | PD3   | B5_2 | 1 | 2005 |
| Meaning of Work              | Is your work meaningful?                                                                                                              | MW1   | B5_3 | 1 | 2005 |
|                              | Do you feel that the work you do is important?                                                                                        | *MW2  | B5_4 | 1 | 2005 |
| Commitment to Workplace      | Are you proud of being part of this company?                                                                                          | *CW5  | B5_5 | 1 | 2005 |
|                              | Do you enjoy telling others about your place of work?                                                                                 | *CW1  | B5_6 | 1 | 2005 |
| Predictability of Work       | At your place of work, are you informed well in advance concerning for example important decisions, changes, or plans for the future? | PR1   | B6_1 | 1 | 2005 |
|                              | Do you receive all the information you need in order to do your work well?                                                            | PR2   | B6_2 | 1 | 2005 |
| Role Clarity                 | Does your work have clear objectives?                                                                                                 | CL1   | B6_3 | 1 | 2005 |
|                              | Do you know exactly which areas are your responsibility?                                                                              | CL2   | B6_4 | 1 | 2005 |
|                              | Do you know exactly what is expected of you at work?                                                                                  | CL3   | B6_5 | 1 | 2005 |
| Role Conflicts               | Are contradictory demands placed on you at work?                                                                                      | CO2   | B6_6 | 1 | 2005 |
|                              | Do you sometimes have to do things, which ought to have been done in a different way?                                                 | CO3   | B6_7 | 1 | 2005 |
|                              | Do you sometimes have to do things, which seem to be unnecessary?                                                                     | *IT1  | B6_8 | 1 | 2005 |
| Quality of Leadership        | To what extent would you say that your immediate superior makes sure that the members of staff have good development opportunities?   | *QLX1 | B7_1 | 1 | 2005 |
|                              | To what extent would you say that your immediate superior gives high priority to job satisfaction?                                    | *QL2  | B7_2 | 1 | 2005 |
|                              | To what extent would you say that your immediate superior is good at work planning?                                                   | QL3   | B7_3 | 1 | 2005 |
|                              | To what extent would you say that your immediate superior is good at solving conflicts?                                               | QL4   | B7_4 | 1 | 2005 |
| Support at Work              | How often do you get help and support from your colleagues, if needed?                                                                | SCX1  | B8_1 | 1 | 2005 |
|                              | How often are your colleagues willing to listen to your problems at work, if needed?                                                  | *SCX2 | B8_2 | 1 | 2005 |
|                              | How often do you get help and support from your immediate superior, if needed?                                                        | SSX2  | B8_3 | 1 | 2005 |
|                              | How often is your immediate superior willing to listen to your problems at work, if needed?                                           | *SSX1 | B8_4 | 1 | 2005 |
| Feedback                     | How often does your immediate superior talk with you about how well you carry out your work?                                          | *SSX3 | B8_5 | 1 | 2005 |
|                              | How often do your colleagues talk with you about how well you carry out your work?                                                    | *SC3  | B8_6 | 1 | 2005 |
| Quantity of Social Relations | Is it possible for you to talk to your colleagues while you are working?                                                              | -     | B8_7 | 1 | 2005 |
| Sense of Community           | Is there a good atmosphere between you and your colleagues?                                                                           | SW1   | B8_8 | 1 | 2005 |
|                              | Is there good co-operation between the colleagues at work?                                                                            | *SW2  | B8_9 | 1 | 2005 |

|                                        |                                                                                                                        |      |       |                 |      |
|----------------------------------------|------------------------------------------------------------------------------------------------------------------------|------|-------|-----------------|------|
| Unfair Treatment                       | How often do you feel unjustly criticised, bullied or shown up in front of others by your colleagues or your superior? | -    | B8_1  | 5               | 2005 |
| Trust and Justice                      | Does the management trust the employees to do their work well?                                                         | TM1  | B8a_1 | 2               | 2010 |
|                                        | Can the employees trust the information that comes from the management?                                                | TMX2 | B8a_2 | 2               | 2010 |
|                                        | Are conflicts resolved in a fair way?                                                                                  | JU1  | B8a_3 | 2               | 2010 |
|                                        | Is the work distributed fairly?                                                                                        | JU4  | B8a_4 | 2               | 2010 |
| Recognition                            | Is your work recognized and appreciated by the management?                                                             | *JU2 | B8a_5 | 2               | 2017 |
| Work Environment /<br>Phys. Demands    | How often do you have to do physically strenuous work such as lift, carry or raise heavy objects?                      | -    | B8b_1 | 6               | 2014 |
|                                        | How often are you exposed to noise or loud background noise at your workplace?                                         | -    | B8b_2 | 6               | 2014 |
|                                        | How often do you come in contact with chemicals or hazardous substances at your work?                                  | -    | B8b_3 | 6               | 2014 |
|                                        | How often are you exposed to extreme temperatures or a draft at your workplace?                                        | -    | B8b_4 | 6               | 2014 |
|                                        | How often are you exposed to poor air quality at work, e.g. cigarette smoke, gases or similar?                         | -    | B8b_5 | 6               | 2014 |
|                                        | How often are you exposed to poor lighting conditions at work, for example, glaring or low light?                      | -    | B8b_6 | 6               | 2014 |
| Job Insecurity                         | Are you worried about becoming unemployed?                                                                             | J11  | B9_1  | 1               | 2005 |
|                                        | Are you worried about new technology making you redundant?                                                             | *J12 | B9_2  | 1               | 2005 |
|                                        | Are you worried about it being difficult for you to find another job if you became unemployed?                         | J13  | B9_3  | 1               | 2005 |
| Insecurity over<br>Working Conditions  | Are you worried about being transferred to another job against your will?                                              | IW1  | B9_4  | 1               | 2005 |
|                                        | Are you worried about the timetable being changed (shift, weekdays, time to enter and leave, ...) against your will?   | *IW3 | B9_5  | Int.<br>Network | 2017 |
|                                        | Are you worried about a decrease in your salary?                                                                       | *IW4 | B9_6  | Int.<br>Network | 2017 |
| Intention to leave<br>Profession / Job | In the past 12 months, how often have you thought about giving up your profession?                                     | -    | B10_1 | 7               | 2005 |
|                                        | In the past 12 months, how often have you thought about changing your job?                                             | -    | B10_2 | FFAW            | 2005 |
| Job Satisfaction                       | Regarding your work in general. How pleased are you with your work prospects?                                          | *JS1 | B11_1 | 1               | 2005 |
|                                        | Regarding your work in general. How pleased are you with the people you work with?                                     | -    | B11_2 | 1               | 2005 |
|                                        | Regarding your work in general. How pleased are you with the physical working conditions?                              | *JS2 | B11_3 | 1               | 2005 |
|                                        | Regarding your work in general. How pleased are you with the way your group is run?                                    | -    | B11_4 | 1               | 2005 |
|                                        | Regarding your work in general. How pleased are you with the way your abilities are used?                              | *JS3 | B11_5 | 1               | 2005 |
|                                        | Regarding your work in general. How pleased are you with your salary?                                                  | *JS5 | B11_6 | Int.<br>Network | 2017 |

|                    |                                                                                                                        |      |       |    |      |
|--------------------|------------------------------------------------------------------------------------------------------------------------|------|-------|----|------|
|                    | Regarding your work in general. How pleased are you with your job as a whole, everything taken into consideration?     | JS4  | B11_7 | 1  | 2005 |
| Work Engagement    | At my work, I am full of energy.                                                                                       | *WE1 | B14_1 | 8  | 2017 |
|                    | I am enthusiastic about my job.                                                                                        | *WE2 | B14_2 | 8  | 2017 |
|                    | I am immersed in my work.                                                                                              | *WE3 | B14_3 | 8  | 2017 |
| General Health     | Your present health state if you evaluate the best conceivable state of health at 10 points and the worst at 0 points. | *GH2 | B12   | 1  | 2005 |
| Burnout Symptoms   | How often do you feel physically exhausted?                                                                            | *BO2 | B13_1 | 1  | 2005 |
|                    | How often do you feel emotionally exhausted?                                                                           | *BO3 | B13_2 | 1  | 2005 |
|                    | How often do you feel worn out?                                                                                        | *BO1 | B13_3 | 1  | 2005 |
| Presenteeism       | How often does it occur that you come to work, even though you really feel unwell and sick?                            | -    | B13_4 | 9  | 2010 |
| Inability to Relax | How often are you not able to stop thinking about work in your free time?                                              | -    | B13_5 | 10 | 2017 |

2 COPSOQ I (Nübling, Stöbel, Hasselhorn, Michaelis & Hofmann, 2005), (Kristensen, Hannerz, Høgh & Borg, 2005)

5 COPSOQ II (Pejtersen, Kristensen, Borg & Bjorner, 2010)

38 Netemeyer et al. (Netemeyer, Boles & McMurrian, 1996)

39 IGA (Hassler, Rau, Hupfeld & Paridon, 2016)

40 BIBB/IAB (Zentralarchiv für Empirische Sozialforschung, o.J.)

41 BIBB/BAuA (Fuchs, 2006)

42 NEXT (Hasselhorn et al., 2003)

21 UWES (Schaufeli, Bakker & Salanova, 2016)

43 Krause et al. (Krause, Dorsemagen, Stadlinger & Baeriswyl, 2012)

44 Sonnentag et al. (Sonnentag, Unger & Nägel, 2013)
